# Supplementary material
Source: HighWire-hosted journal article supplement (http://thorax.bmjjournals.com/highwire/filestream/174071/field_highwire_adjunct_files/2/633251webonlyapp3.pdf)

Figure E2

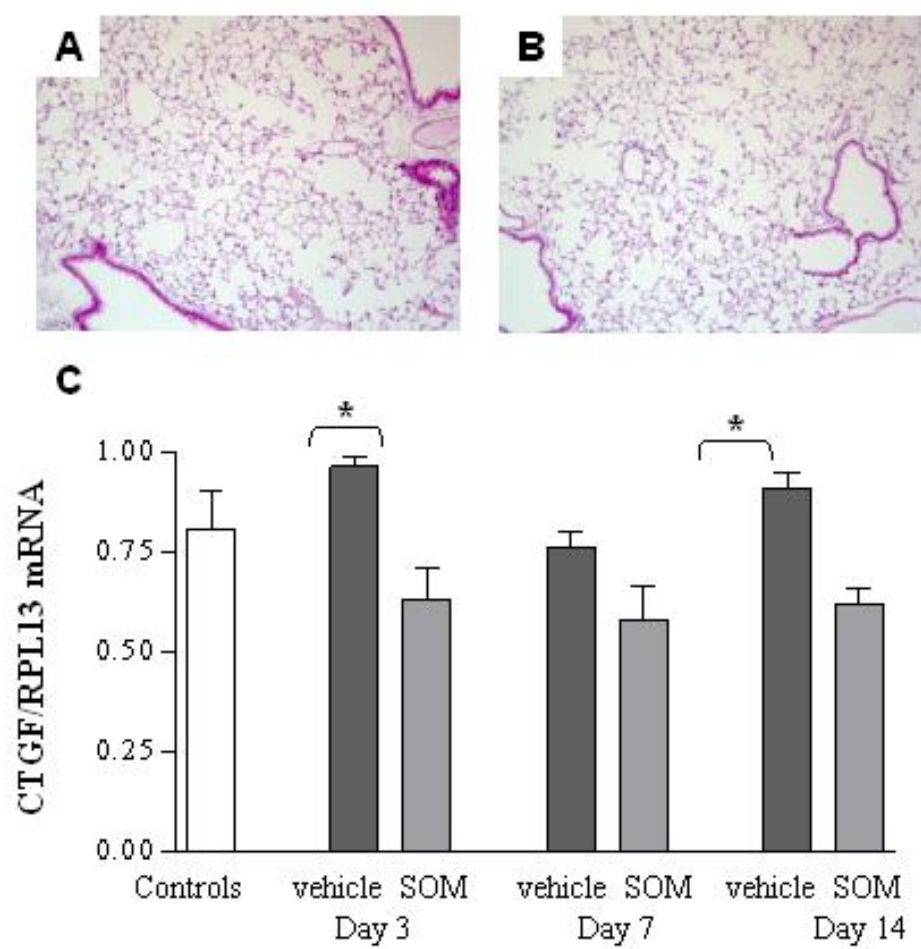

Supplement: 633251webonlyapp3.pdf [file 633251webonlyapp3.pdf]
